# Supplementary material
Source: HighWire-hosted journal article supplement (https://bmjopen.bmj.com/content/9/11/e029988)
Supplement: inline-supplementary-material-1 [file inline-supplementary-material-1.pdf]

| Supplementary Table 1.<br>Extracted Data      | Study Characteristics        |                         |                                                                                           |        |                                                              |                                          | Factors for Well-being                                                                                                    |                                                                                                            |                                                                                                                                                                                           |
|-----------------------------------------------|------------------------------|-------------------------|-------------------------------------------------------------------------------------------|--------|--------------------------------------------------------------|------------------------------------------|---------------------------------------------------------------------------------------------------------------------------|------------------------------------------------------------------------------------------------------------|-------------------------------------------------------------------------------------------------------------------------------------------------------------------------------------------|
| Study Abbreviation<br>(*Japanese publication) | Study Design                 | Study Area              | Migrant Nationality                                                                       | Number | Mental Health Variable                                       | Epi Tool                                 | Barrier                                                                                                                   | Facilitator                                                                                                | Policy recommendation related to international migrants                                                                                                                                   |
| <b>Students</b>                               |                              |                         |                                                                                           |        |                                                              |                                          |                                                                                                                           |                                                                                                            |                                                                                                                                                                                           |
| Kakefuda, 2004 * <sup>16</sup>                | Cross-sectional, Qualitative | Honshu                  | Brazilian                                                                                 | 66     | Adaptation<br>Mental well-being                              | Questionnaire Interview                  | Low Japanese language skills,<br>Low support from teachers or parents,<br>Problems with studying                          | Good communication with Japanese or other Nikkei Brazilians,<br>Having plan for after graduation or future | Creation of a mental health care system for foreign students.                                                                                                                             |
| Qu, 2013 <sup>17</sup>                        | Cross-sectional              | Tokyo                   | Chinese                                                                                   | 194    | Mental well-being                                            | ECRS<br>GHQ<br>VIA                       | Attachment Anxiety,<br>Attachment Avoidance,<br>Length of Stay beyond one year                                            | Cultural Identity                                                                                          | Improve intercultural communication between Asian countries to facilitate clinical interventions and prevention programs.                                                                 |
| Sun, 2013 <sup>18</sup>                       | Cross-sectional              | Tokyo                   | Chinese                                                                                   | 253    | Psychological distress                                       | Questionnaire<br>GHQ-30<br>AAS<br>TCI    | Marginalization (loss of original culture but do identify with new one; a poor acculturation strategy),<br>Harm Avoidance | Social support,<br>Self-directedness                                                                       | Foster a positive outlook between Japanese culture and Chinese culture;<br>Mass media from both countries should aim to promote mutual understanding and acceptance.                      |
| Eskandrieh, 2012 <sup>19</sup>                | Cross-sectional              | Sapporo                 | Chinese (40%)<br>other Asians (32%)<br>South Koreans (14%)<br>non-Asians (14%)            | 480    | Depressive symptoms                                          | Questionnaire<br>CES-D                   | Female,<br>Masters degree student,<br>Arts students,<br>Self supporting,<br>Living alone                                  | None                                                                                                       | Examination of the mental health condition of international students;<br>Japan requires more conclusive evidence for the seriousness of mental health and should take appropriate action. |
| Murphy-Shigematsu, 2002 <sup>20</sup>         | Qualitative                  | Nonspecific Japan       | Unspecified<br>Various                                                                    | 15     | Psychological barriers                                       | Counseling Sessions                      | Unrealistic post-migration expectations,<br>Discrimination,<br>Cross-cultural communication                               | Coping strategies,<br>Support-seeking,<br>Refocusing of goals                                              | Multicultural training for university staff;<br>Support systems for international students such as pre-departure and post-arrival orientations.                                           |
| Guo, 2013 <sup>21</sup>                       | Cross-sectional              | Sapporo                 | Chinese                                                                                   | 142    | Social capital<br>Mental well-being                          | Questionnaire<br>ISCS<br>SWLS<br>ASSIS   | Dependence on SNS for entertainment,<br>Acculturative stress                                                              | Use of SNS for information seeking,<br>social capital                                                      | Further studies on SNS use and acculturation.                                                                                                                                             |
| Ozeki, 2006 <sup>22</sup>                     | Cross-sectional              | Aomori City             | Chinese-speaking (39)<br>English-speaking (32)                                            | 71     | Transcultural stress                                         | Questionnaire<br>GHQ-30                  | Finances,<br>Being a Chinese-Speaker                                                                                      | Being an English-speaker                                                                                   | Provide support for Chinese speakers in terms information in native language and adapting to daily life in Japan.                                                                         |
| Zheng, 2005 <sup>23</sup>                     | Cross-sectional              | Tokyo                   | Chinese                                                                                   | 161    | Psychosocial impact                                          | Questionnaire<br>Open-ended questions    | Studying medicine or social sciences;<br>Migration from a SARS affected area of China                                     | More than a year of residence;<br>below age 31                                                             | Social discrimination against students during disease outbreaks should be minimized;<br>A safe environment should be fostered for their recovery.                                         |
| Kono, 2014 <sup>24</sup>                      | Cross-sectional              | Sapporo                 | Chinese (166)<br>South Korean (59)<br>Other Asian (139)<br>Non-Asian (64)                 | 480    | Depressive symptoms                                          | Questionnaire<br>CES-D                   | Lack of scholarship,<br>Poor housing conditions                                                                           | Sleep quality,<br>Exercise                                                                                 | Authorities should make sure international students can support themselves and maintain their health.                                                                                     |
| Ma, 2007 * <sup>25</sup>                      | Cross-sectional              | Kanto, Tohoku, Hokkaido | Chinese                                                                                   | 267    | Mental health status<br>Psychosociological factors           | Questionnaire GHQ SDS                    | Female,<br>Feeling irritated daily,<br>Uneasy characteristics,<br>Low self-esteem                                         | Emotional support network                                                                                  | Improve emotional support networks for international students;<br>Further studies to compare student mental health status in Japan and China.                                             |
| Matsuda, 2013 <sup>26</sup>                   | Cross-sectional              | Kyushu                  | Chinese                                                                                   | 199    | Stress management                                            | Questionnaire<br>DHQ-28                  | Pre-contemplation and contemplation stage stress management                                                               | Maintenance stage stress management,<br>Actively practicing stress management behavior                     | None                                                                                                                                                                                      |
| Hori, 2012 <sup>27</sup>                      | Retrospective, Case series   | Ibaraki                 | Asian (66%)<br>Russian (10%)<br>European (7%)<br>Latin american and African (5%)<br>mixed | 59     | Depression, Adjustment disorder, Insomnia, and Schizophrenia | Medical records (diagnosed using ICD-10) | Stresses related to studying,<br>Inter-personal relationship problems,<br>Cultural stress                                 | None                                                                                                       | Preparations for emergency consultations by non-Japanese at health centers.                                                                                                               |

|                                    |                                |                                         |                                                                  |                             |                                            |                                          |                                                                                                                                                                |                                                                                                                               |                                                                                                                                                                                                                                                                                                                                 |
|------------------------------------|--------------------------------|-----------------------------------------|------------------------------------------------------------------|-----------------------------|--------------------------------------------|------------------------------------------|----------------------------------------------------------------------------------------------------------------------------------------------------------------|-------------------------------------------------------------------------------------------------------------------------------|---------------------------------------------------------------------------------------------------------------------------------------------------------------------------------------------------------------------------------------------------------------------------------------------------------------------------------|
| Wang, 2009 * <sup>28</sup>         | Cohort study<br>Qualitative    | Tokyo, Ibaraki                          | Chinese                                                          | 7                           | Mental stress                              | GHQ-30<br>Semi-structured interview      | Weak personal relationships,<br>Loneliness,<br>Poor daily life management,<br>Psychosomatic diseases                                                           | Comfortable lifestyle,<br>Good relationship with others,<br>Clear aim of studying abroad                                      | Provide guidance for daily life management;<br>Provide information about studying and future;<br>Support the creation of communication networks.                                                                                                                                                                                |
| Mizuno, 2000 * <sup>29</sup>       | Cross-sectional                | Kanto area, Tokai<br>area, Chugoku area | Chinese (159)<br>Korean (59)<br>Taiwanese (46)                   | 264                         | Mental support<br>Help-seeking behavior    | Questionnaire                            | Concerns about helper<br>responsiveness, Living with spouse                                                                                                    | Female,<br>Experience with professional<br>supports                                                                           | Construct a more effective support system                                                                                                                                                                                                                                                                                       |
| <b>Workers</b>                     |                                |                                         |                                                                  |                             |                                            |                                          |                                                                                                                                                                |                                                                                                                               |                                                                                                                                                                                                                                                                                                                                 |
| Lee, 2015 * <sup>30</sup>          | Cross-sectional<br>Comparative | Tokyo                                   | Korean (66)<br>Chinese (50)<br>other Asian (8)<br>non-Asian (2)  | INTL (126)<br>JP (150)      | Job stress and mental health               | Questionnaire                            | Overwork, Interpersonal relationship<br>stress                                                                                                                 | None                                                                                                                          | A prevention-centered strategy is needed to address job stress.                                                                                                                                                                                                                                                                 |
| Asakura, 2008 <sup>31</sup>        | Cross-sectional                | Northern Kanto                          | Brazilian                                                        | 313                         | Psychological symptoms                     | Questionnaire<br>GHQ-12                  | Discrimination,<br>Environmental hazards at work,<br>Higher education (low-skill job<br>mismatch),<br>Higher Japanese level (can<br>understand discrimination) | None                                                                                                                          | To improve the health of migrants:<br>Establish policies and practices designed to decrease ethnic<br>discrimination in the workplace;<br>Improve education about diversity.                                                                                                                                                    |
| Onishi, 2003 <sup>32</sup>         | Qualitative                    | Tokyo                                   | Bangladeshi (13)<br>Pakistani (7)<br>Iranian (4)                 | 24                          | Coping Strategies for Mental<br>Well-being | Narrative analysis of<br>Interviews      | Perceived low social status,<br>Societal disregard of their socio-<br>economic background,<br>Prejudice                                                        | Adapting to and accepting Japanese<br>language and culture,<br>Strong Muslim identity                                         | Develop immigration policies that empower migrants as<br>participants in society and potential Japanese citizens, not only to<br>fill economic needs;<br>Media should create more positive image of non-Japanese;<br>Schools should develop cultural awareness and tolerance for<br>diversity to foster a multi-cultural Japan. |
| Ohara-Hirano, 2000 <sup>33</sup>   | Qualitative                    | Tokyo                                   | Filipino                                                         | 265                         | Stress                                     | Categorization of Interview<br>responses | Worry about sending money home,<br>How family will use such money                                                                                              | Emotional support from family                                                                                                 | It is important to consider how a migrant's cultural background<br>informs their adjustment to living in Japan.                                                                                                                                                                                                                 |
| Date, 2009 <sup>34</sup>           | Cross-sectional                | Nagasaki City                           | Chinese                                                          | 81                          | Depressive Symptoms                        | Questionnaire<br>CES-D                   | Longer working hours,<br>Age over 30 years                                                                                                                     | None                                                                                                                          | Health authorities should consider working time and age as<br>important indicators for reducing depressive symptoms among<br>foreign workers.                                                                                                                                                                                   |
| Ohara-Hirano, 2005 * <sup>35</sup> | Comparative<br>Cross-sectional | Kanto                                   | Filipino                                                         | in JPN (265)<br>in KR (401) | Socio-economic strain,<br>Depression       | Questionnaire<br>CES-D                   | Strain about family,<br>Strain about future                                                                                                                    | None                                                                                                                          | Consider the background not only the host country but also the<br>labor-exporting country to understand migrant mental health.                                                                                                                                                                                                  |
| Cho, 2005 * <sup>36</sup>          | Case series                    | Japan                                   | Chinese (11)<br>Indonesian (2)<br>Vietnamese (1)<br>Filipino (1) | 15                          | Suicide                                    | Secondary data (JITCO)                   | Male,<br>Age over 30 years,<br>Shorter stay in Japan (<8 months),<br>Lack of communication                                                                     | None                                                                                                                          | With rapid deterioration of mental conditions, the economic burden<br>of foreign workers and possible feelings of failures should be taken<br>into account;<br>Appropriate psychiatric treatment is then required.                                                                                                              |
| <b>EPA Care Workers</b>            |                                |                                         |                                                                  |                             |                                            |                                          |                                                                                                                                                                |                                                                                                                               |                                                                                                                                                                                                                                                                                                                                 |
| Ohara-Hirano, 2012 <sup>37</sup>   | Cross-sectional                | Indonesia                               | Indonesian                                                       | 102                         | Mental Health Status                       | Questionnaire<br>GHQ                     | Difficulty bringing family to Japan,<br>Worry about national board<br>examination                                                                              | Strong motivations for working in<br>Japan                                                                                    | More studies comparing Filipino and Indonesian EPA nurse mental<br>health.                                                                                                                                                                                                                                                      |
| Nugraha, 2016 <sup>38</sup>        | Cross-sectional                | Japan                                   | Indonesian                                                       | 92                          | Mental Health Predictors                   | Questionnaire<br>GHQ-12<br>MSPSS<br>SCAS | Female,<br>Feeling skills are underutilized,<br>Fatigue                                                                                                        | Social support,<br>Job satisfaction,<br>Sociocultural adaption,<br>Confidence about passing the<br>national board examination | Provide information to prospective care workers about working<br>conditions in mother language to better prepare them physically<br>and mentally for migration to Japan;<br>Long-term follow-up studies are recommended.                                                                                                        |
| Sato, 2016 <sup>39</sup>           | Cross-sectional                | Japan                                   | Indonesian                                                       | 71                          | Mental Health Status                       | Questionnaire<br>GHQ-28                  | Female,<br>Having passed the national board<br>certification                                                                                                   | Language support,<br>Informational support                                                                                    | Sharing experiences gained by health facilities that have accepted<br>EPA nursing staff previously;<br>Establishment of an ongoing support system aimed at workers who<br>have completed the national qualifications.                                                                                                           |

|                                   |                                |                   |                                                                      |                                |                                 |                                     |                                                                                                                                                                                                           |                                                                                                                                           |                                                                                                                                                                                                         |
|-----------------------------------|--------------------------------|-------------------|----------------------------------------------------------------------|--------------------------------|---------------------------------|-------------------------------------|-----------------------------------------------------------------------------------------------------------------------------------------------------------------------------------------------------------|-------------------------------------------------------------------------------------------------------------------------------------------|---------------------------------------------------------------------------------------------------------------------------------------------------------------------------------------------------------|
| Yamamoto, 2018 * <sup>40</sup>    | Cross-sectional                | Japan             | Indonesian (38)<br>Filipino (26)<br>Vietnamese (8)                   | 72                             | Stress                          | Questionnaire<br>SOC                | Qualitative burden,<br>Physical burden,<br>Confusion about workstyle<br>differences between Japan and the<br>participant's country,<br>Degree of skill utilization,<br>Job suitability                    | Adjustment to life in Japan,<br>Understanding Japanese language,<br>Satisfaction of work and life,<br>Higher sense of coherence           | Consideration of job burden and workplace environment to improve<br>sense of coherence.                                                                                                                 |
| <b>Exclusively Women</b>          |                                |                   |                                                                      |                                |                                 |                                     |                                                                                                                                                                                                           |                                                                                                                                           |                                                                                                                                                                                                         |
| Paillard-Borg, 2018 <sup>41</sup> | Qualitative                    | Tokyo             | Filipino                                                             | 3                              | Subjective Well-Being           | Focus Group Interview               | Japanese language,<br>Isolation from family,<br>Overwork                                                                                                                                                  | Religion,<br>Connection with migrant<br>community,<br>Maternal Identity                                                                   | Support for and education about the health of migrant women.                                                                                                                                            |
| Shah, 2018 <sup>42</sup>          | Cross-sectional                | Kanto Area        | Nepalese                                                             | 189                            | Quality Of Life                 | Questionnaire<br>WHOQOL-BREF        | Differences in medical culture,<br>Unwanted pregnancy,<br>Abortion                                                                                                                                        | Health education                                                                                                                          | Reproductive health education for migrants.                                                                                                                                                             |
| <b>Mothers</b>                    |                                |                   |                                                                      |                                |                                 |                                     |                                                                                                                                                                                                           |                                                                                                                                           |                                                                                                                                                                                                         |
| Martinez, 2017 * <sup>43</sup>    | Qualitative                    | Northern Kanto    | Brazilian                                                            | 18                             | Mental health                   | Semi-structured interviews          | Pregnancy and child rearing,<br>Anxiety about work and income,<br>Complications due to being a<br>foreigner,<br>Absence of social support                                                                 | Equal and deeply connected family,<br>Strength to continue working,<br>Choosing the right conditions to<br>settle down in,<br>Religiosity | Understand the socio-cultural factors affecting the health;<br>Provide intervention that lead pregnant and perperal Brazilian<br>women to have appropriate health behaviors.                            |
| Kawasaki, 2014 * <sup>44</sup>    | Systematic Review              | Japan             | Various                                                              | Study:<br>INTL (15)<br>JP (18) | Mental health status<br>support | Systematic Review                   | Cross-cultural conflict, Dilemma,<br>Lack of support, Isolation, Loneliness                                                                                                                               | None                                                                                                                                      | Immigrant women need access to information and social support<br>services, and help in coping with difficulties as immigrants.                                                                          |
| Jin, 2016 <sup>45</sup>           | Mixed-method                   | Kanto             | Chinese                                                              | 22                             | Depression<br>Stress            | Questionnaire<br>EPDS<br>SSS<br>CCS | Unable to follow traditional birthing<br>preparation,<br>low socio-economic status                                                                                                                        | Social Support                                                                                                                            | Trascultural healthcare training in Japan, especially on Chinese<br>birthing practices (Zuoyuezi and Yuezican) to reduce cross-cultural<br>stress.                                                      |
| Kita, 2015 <sup>46</sup>          | Systematic Review              | Japan             | Various                                                              | Study:<br>INTL (1)<br>JP (35)  | Psychological Health            | Systematic Review                   | Anxiety about birth in Japan,<br>Lack of support, Social isolation,<br>Language barrier,<br>Lack of information,<br>Racial discrimination,<br>Limited access to health care,<br>Low socio-economic status | Strengthening social-connectedness                                                                                                        | Establishment of multilingual and culture-specific health services,<br>strengthened social and support networks as well as support and<br>political action.                                             |
| Imai, 2017 <sup>47</sup>          | Cross-sectional<br>Comparative | Japan             | Chinese (29)<br>Korean (8)<br>Vietnamese (5)<br>Fiipino (5)<br>Mixed | INTL (68)<br>JP (97)           | Depressive Symptoms             | Questionnaire<br>EPDS<br>SSPS-P     | Lack of support from partner or<br>family,<br>Low socio-economic status                                                                                                                                   | None                                                                                                                                      | Medical staff to encourage support from family and provide<br>information about prepatory maternal services                                                                                             |
| Bunketsu, 2010 * <sup>48</sup>    | Cross-sectional                | Kanto             | Chinese                                                              | 132                            | Child-rearing stress            | Questionnaire                       | Time limited due to childcare,<br>Worry about their children after<br>return to China,<br>Difficulties in maintaining work and<br>family balance,<br>Loneliness                                           | Talking with with Chinese friends,<br>Making efforts to change their<br>moode or perception,<br>Patience                                  | For prompt and effective harmonazation with Japanese society,<br>Provide Childcare support with easy-to-use child care facilities,<br>Chance of studing Japanese, Well-baby clinic conducted in Chinese |
| Shimizu, 2002 * <sup>49</sup>     | Cross-sectional<br>Comparative | Kanto, Chubu area | Brazilian (111)<br>Chinese (70)<br>Korean (29)                       | INTL (210)<br>JP (625)         | Parenting stress                | Questionnaire                       | Difficulties with work and child<br>rearing balance, Worry about child<br>characteristics or language ability,<br>Inadequacy of child care<br>environment                                                 | Seek help for others                                                                                                                      | Establish a place to relieve stress speaking native language                                                                                                                                            |

|                                    |                                |                             |                                                                                     |                                     |                                               |                                                    |                                                                                                                                   |                                                                                               |                                                                                                                                                                                                                                                |
|------------------------------------|--------------------------------|-----------------------------|-------------------------------------------------------------------------------------|-------------------------------------|-----------------------------------------------|----------------------------------------------------|-----------------------------------------------------------------------------------------------------------------------------------|-----------------------------------------------------------------------------------------------|------------------------------------------------------------------------------------------------------------------------------------------------------------------------------------------------------------------------------------------------|
| Fujiwara, 2007 * <sup>50</sup>     | Qualitative                    | Tokyo                       | Asian<br>European<br>Middle Eastern                                                 | 9                                   | Loneliness<br>Isolation                       | Semi-structured interviews                         | Difficulties in verbal communication,<br>Confusion with Japanese medical<br>culture, Less support                                 | Positive attitude by midwife towards<br>interaction                                           | Provide enough time for caring, Set-up translators or multi-<br>language brochure                                                                                                                                                              |
| <b>General Migrant Populations</b> |                                |                             |                                                                                     |                                     |                                               |                                                    |                                                                                                                                   |                                                                                               |                                                                                                                                                                                                                                                |
| Shakya, 2018 <sup>51</sup>         | Cross-sectional                | Central Japan               | Nepalese                                                                            | 642                                 | Mental Health Status                          | Questionnaire<br>MSPSS<br>PSS<br>CES-D<br>SCL-90-R | Needing a interpreter during visit to<br>Japanese healthcare facility                                                             | Paying health insurance regularly,<br>satisfactory self-rated health, longer<br>stay in Japan | Interventions focusing on reduction of language barrier between<br>migrants and health workers.                                                                                                                                                |
| Koyama, 2016 <sup>52</sup>         | Case Series                    | Osaka                       | American (5)<br>Chinese (5)<br>Australian (2)<br>Taiwanese (2)<br>Various           | 20                                  | Mental Halth Consultation                     | Medical Records                                    | Cultural differences, Japanese<br>language barriers to describe<br>symptoms                                                       | None                                                                                          | Sensitization of health care professionals to transcultural care by<br>facilitating medical professional interpreters and liaison-<br>consultation models. Government should introduce comprehensive<br>social support of non-Japanese people. |
| Moon, 2007 <sup>53</sup>           | Cross-sectional<br>Comparative | Osaka                       | Korean (204)                                                                        | KR (204)<br>JP (221)                | Subjective well-being                         | Questionnaire<br>CGA<br>TMIG-IC<br>GDS-15          | Korean ethnicity,<br>Absence of sense of purpose of life                                                                          | None                                                                                          | More pro-active ethnicity-specific support from existing community<br>organizations and authorities.                                                                                                                                           |
| Koyama, 2012 <sup>54</sup>         | Case Series                    | Osaka                       | American (2)<br>Australia (1)<br>New Zealand (1)<br>England (1)                     | 5                                   | Mental Health Consultation                    | Medical Records<br>SDS<br>STAI                     | Cultural differences, Japanese<br>language barriers to describe<br>symptoms,<br>Unemployment                                      | None                                                                                          | Promotion of transcultural medical interpreters for psychosomatic<br>medicine and comprehensive social support system for non-<br>Japanese by government.                                                                                      |
| Ichikawa, 2006 <sup>55</sup>       | Cross-sectional                | Tokyo<br>Osaka              | Afghan                                                                              | 55                                  | Anxiety<br>Depression<br>Posttraumatic Stress | Questionnaire<br>HSCL-25<br>HTQ                    | Detention by immigration<br>authorities,<br>Premigration trauma exposure,<br>Living alone                                         | None                                                                                          | Reconsideration of tightening of immigration policies in terms of<br>both health and human rights.                                                                                                                                             |
| Itoi, 2007 * <sup>56</sup>         | Cross-sectional                | Kanto                       | Cambodian                                                                           | 49                                  | Acculturative stress                          | Questionnaire<br>modified LASC-I                   | Female,<br>Less education,<br>Fewer Japanese language skills,<br>Shorter length of staying in Japan,<br>Lower occupational status | None                                                                                          | Improve the education systems, Japanese language education, an<br>employment systems, develop a program to promote an education<br>for the people in the host country                                                                          |
| Fukaya, 2002 * <sup>57</sup>       | Cross-sectional                | Kanagawa prefecture         | Filipino (43)<br>Nikkei-Brazilian (38)<br>Various                                   | 110                                 | Acculturative stress<br>Depressive symptoms   | LASC-I<br>CES-D<br>ISEL-S                          | Less education,<br>Shorter length of stay,<br>Lower social support                                                                | Social support                                                                                | Increase social support for foreign residents.                                                                                                                                                                                                 |
| Ohara-Hirano, 2001 * <sup>58</sup> | Cross-sectional                | Kyushu                      | Filipino (36%)<br>Peruvian (9.4%)<br>Chinese (9.4%)<br>Indonesian (9.0%)<br>Various | 280                                 | Depressive symptoms                           | Questionnaire<br>CES-D                             | Non-western national origin,<br>Migration to Japan for work or<br>training                                                        | Western origin nationality,<br>Migration to Japan for marriage,<br>Live with family           | Japanese society needs to set up support systems for finding jobs,<br>improving daily life, and so on.                                                                                                                                         |
| Lee, 2009 <sup>59</sup>            | Cross-sectional<br>Comparative | Japan                       | North Korean defector                                                               | in JP (30)<br>in KR (51)<br>JP (43) | Mental health and Quality of<br>Life          | BDI<br>WHOQOL-Bref<br>Semi-Structured Interview    | Language fluency,<br>Adopted nationality                                                                                          | Longer length of stay                                                                         | Better monitoring of pervasive depression among refugees;<br>Consideration of social support system and effective medical<br>interventions for proper adjustment to Japan.                                                                     |
| <b>Brazilian 'Nikkeijin'</b>       |                                |                             |                                                                                     |                                     |                                               |                                                    |                                                                                                                                   |                                                                                               |                                                                                                                                                                                                                                                |
| Miyasaka, 2007 <sup>60</sup>       | Cross-sectional<br>Comparative | Northern Kanto<br>Sao Paulo | Brazilian                                                                           | in BRZ (100)<br>in JP (107)         | Mental Health Disorders                       | Medical Records                                    | Living alone,<br>Staying in Japan for short periods                                                                               | Living with family,<br>Having network of friends                                              | Mental heath professionals should encourage building a network of<br>friends and support systems.                                                                                                                                              |
| Kondo, 2011 <sup>61</sup>          | Cross-sectional<br>Comparative | Northern Kanto<br>Sao Paulo | Brazilian                                                                           | in BRZ (331)<br>in JP (172)         | Mental Health Status                          | SDQ                                                | Adverse circumstances at home and<br>at school while living in Japan                                                              | None                                                                                          | Further verification studies.                                                                                                                                                                                                                  |

|                                 |                                |                           |           |                             |                                    |                                          |                                                                                                                                                                                                  |                                                                                                                               |                                                                                                                                                                                                                                                                                                                                                                                                                                                                                                                                           |
|---------------------------------|--------------------------------|---------------------------|-----------|-----------------------------|------------------------------------|------------------------------------------|--------------------------------------------------------------------------------------------------------------------------------------------------------------------------------------------------|-------------------------------------------------------------------------------------------------------------------------------|-------------------------------------------------------------------------------------------------------------------------------------------------------------------------------------------------------------------------------------------------------------------------------------------------------------------------------------------------------------------------------------------------------------------------------------------------------------------------------------------------------------------------------------------|
| Asakura, 2006 <sup>62</sup>     | Cross-sectional                | Northern Kanto            | Brazilian | 265                         | Psychological disturbance          | Questionnaire GHQ-12                     | Living alone,<br>Longer stay in Japan,<br>Lower economic status,<br>Migration to Japan due to<br>unsatisfactory socio-economic<br>conditions in Brazil,<br>Severe family life concerns           | Moderate Japanese Language<br>proficiency,<br>Plans to return to Brazil as soon as<br>possible                                | Provision of more information about Japan life, culture and<br>working conditions prior to migration to form more accurate<br>expectations and help with adjustment through consultation<br>services;<br>Government policy outlining treatment of foreign workers to stop<br>discrimination and promote equal treatment;<br>Change societal mindset to one of embracing diversity;<br>Opportunities for advancement and job training, NGO and<br>government support services for foreign workers will promote<br>health and assimilation. |
| Tsuji, 2001 <sup>63</sup>       | Cross-sectional                | Northern Kanto            | Brazilian | 40                          | Mental Health Disorders            | Medical Records                          | More distant descendant of Japanese                                                                                                                                                              | Japanese language ability,<br>Length of stay beyond 5 years                                                                   | Further studies on mental health of Brazilians.                                                                                                                                                                                                                                                                                                                                                                                                                                                                                           |
| Miyasaka, 2002 <sup>64</sup>    | Cross-sectional<br>Comparative | Northern Kanto            | Brazilian | in BRZ (213)<br>in JP (158) | Mental Health Status               | Questionnaire<br>SRQ-20                  | Being female,<br>Being a smoker,<br>Previously being a student in Brazil                                                                                                                         | None                                                                                                                          | Authors established a mental health network for Brazilians in<br>Japanese migrant population centers that is proving useful.                                                                                                                                                                                                                                                                                                                                                                                                              |
| Takenoshita, 2015 <sup>65</sup> | Cross-sectional                | Northern Kanto            | Brazilian | 1252                        | Psychological Well-Being           | Secondary Data<br>Questionnaire<br>CES-D | Being Female,<br>Unemployed,<br>Perceived discrimination                                                                                                                                         | Bonding social capital (relatives live<br>nearby)                                                                             | None                                                                                                                                                                                                                                                                                                                                                                                                                                                                                                                                      |
| Honda, 2005 * <sup>66</sup>     | Cross-sectional                | Kanto                     | Brazilian | 150                         | Mental Illness,<br>Risk Factors    | Questionnaire<br>SRQ-20                  | Living alone,<br>Shorter periods of stay<br>( $< 5$ years),<br>Previous psychiatric problems,<br>Lower Japanese ability,<br>Culture conflict between Japan and<br>Brazil                         | None                                                                                                                          | None                                                                                                                                                                                                                                                                                                                                                                                                                                                                                                                                      |
| Tsuji, 2000 * <sup>67</sup>     | Cross-sectional<br>Comparative | Tochigi<br>Bauru (Brazil) | Brazilian | BRZ (213)<br>JP (157)       | Depression                         | Questionnaire<br>SRQ-20                  | Female,<br>Under 30 years old,<br>Being a student prior to immigration                                                                                                                           | None                                                                                                                          | None                                                                                                                                                                                                                                                                                                                                                                                                                                                                                                                                      |
| Tsuji, 2002 * <sup>68</sup>     | Cross-sectional                | Tochigi                   | Brazilian | 151                         | Depression                         | Questionnaire<br>SRQ-20                  | Current findings: Not significant;<br>Findings 2 years previous with same<br>indicators:<br>Female, Youth, Student prior to<br>immigration                                                       | Longer staying in Japan ( $> 2$ years)                                                                                        | None                                                                                                                                                                                                                                                                                                                                                                                                                                                                                                                                      |
| Asakura, 2005 * <sup>69</sup>   | Cross-sectional                | Aichi                     | Brazilian | 112                         | Psychosomatic distress             | Questionnaire                            | Less time spent with parents,<br>Difficulties in adapting to<br>Japanese customs and social<br>environment,<br>Higher frequency being not<br>understood by parents,<br>Poorer adaption to school | Good relationships with Japanese<br>friends,<br>Good family relationships,<br>More social support,<br>Longer staying in Japan | Health promotion for ethnic minority students.                                                                                                                                                                                                                                                                                                                                                                                                                                                                                            |
| Otsuka, 2001 * <sup>70</sup>    | Cross-sectional                | Tochigi                   | Brazilian | 163                         | Acculturation,<br>Mental Disorders | Questionnaire                            | Living alone,<br>Poor acculturation,<br>Isolation from society,<br>Low Japanese language skills,<br>Shorter length of stay                                                                       | Bicultural identity                                                                                                           | None                                                                                                                                                                                                                                                                                                                                                                                                                                                                                                                                      |
